# Supplementary material for: Highly crystalline, small sized, monodisperse α-NiS nanocrystal ink as an efficient counter electrode for dye-sensitized solar cells
Source: Royal Society of Chemistry journal article supplement (doi:10.1039/c5ta02946e), 2015-01-01
Supplement: c5ta02946e1.pdf [file c5ta02946e1.pdf]

## Supplementary Information

### Highly crystalline, small size, monodisperse $\alpha$ -NiS nanocrystal ink as an efficient counter electrode for dye-sensitized solar cells

Xiuwen Wang,<sup>a</sup> Buhe Batter,<sup>a, b</sup> Ying Xie,<sup>a</sup> Kai Pan,<sup>a,\*</sup> Yongping Liao,<sup>a</sup> Chunmei Lv,<sup>a</sup> Mingxia Li,<sup>a</sup> Siyu Sui,<sup>a</sup> Honggang Fu<sup>a,\*</sup>

<sup>a</sup>Key Laboratory of Functional Inorganic Material Chemistry, Ministry of Education, Heilongjiang University, Harbin 150080, People's Republic of China  
Tel.: +86 451 86604330; Fax: +86 451 8667 3647;

E-mail: kaipan@hlju.edu.cn, fuhg@vip.sina.com

<sup>b</sup>College of Materials and Chemical Engineering, Heilongjiang Institute of Technology, Harbin 150050, People's Republic of China

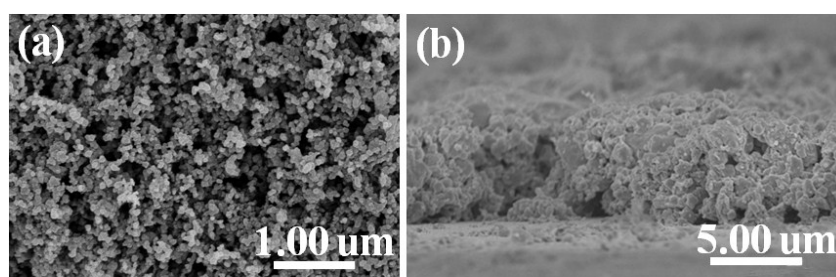

**Figure S1** Top (a) and cross-sectional (b) SEM images of the densely packed  $E_{NiS-300}$ .

**Table S1.** The FWHM values with different planes of NiS-250 and NiS-300.

| Different planes | (100) | (101) | (102) | (110) |
|------------------|-------|-------|-------|-------|
| FWHM (NiS-250)   | 0.833 | 0.887 | 1.109 | 0.890 |
| FWHM (NiS-300)   | 0.624 | 0.632 | 0.837 | 0.684 |

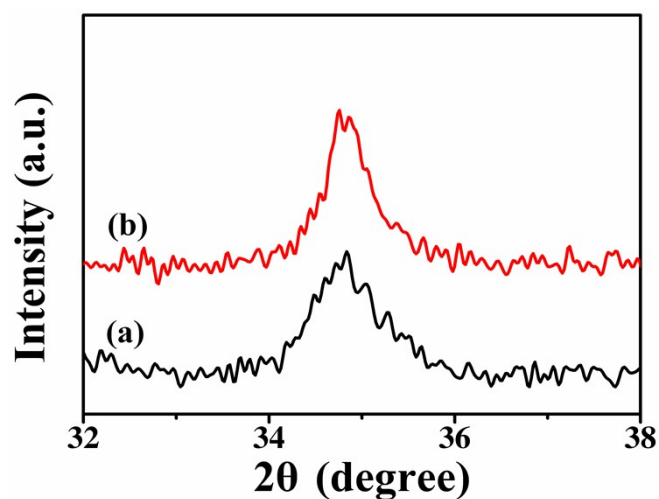

**Figure S2** The magnified XRD patterns of NiS-250 (a), NiS-300 (b), respectively.

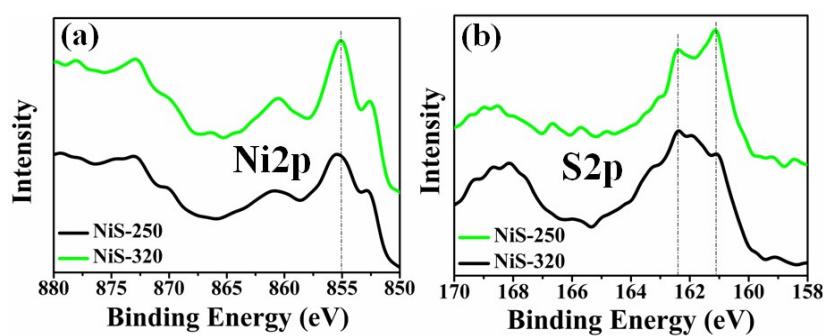

**Figure S3** XPS of NiS-250 and NiS-320 for Ni 2p region (a) and S 2p region (b), respectively.

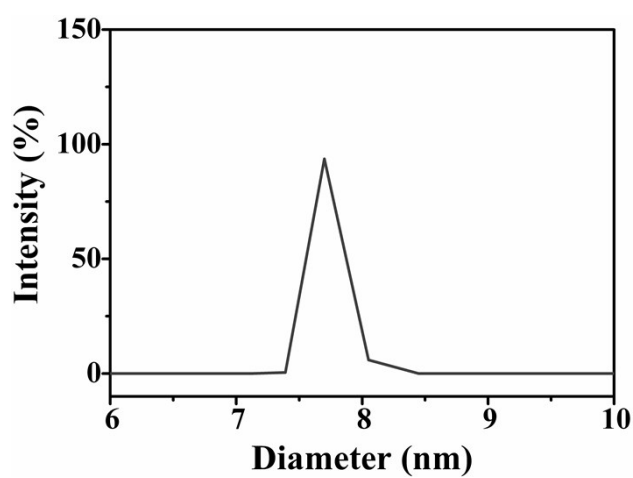

**Figure S4** Dynamic light scattering measurements of NiS-300.

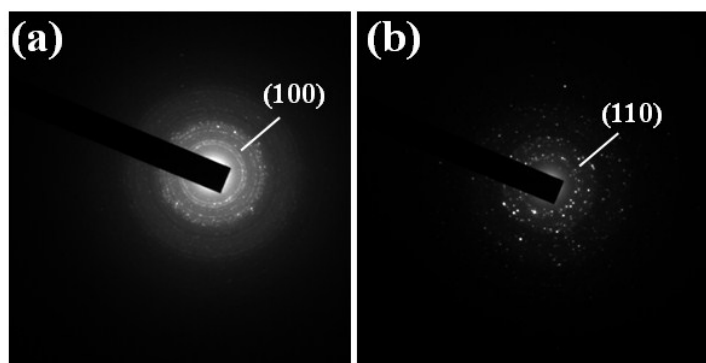

**Figure S5** SAED images of the NiS-250 (a) and NiS-320 (b).

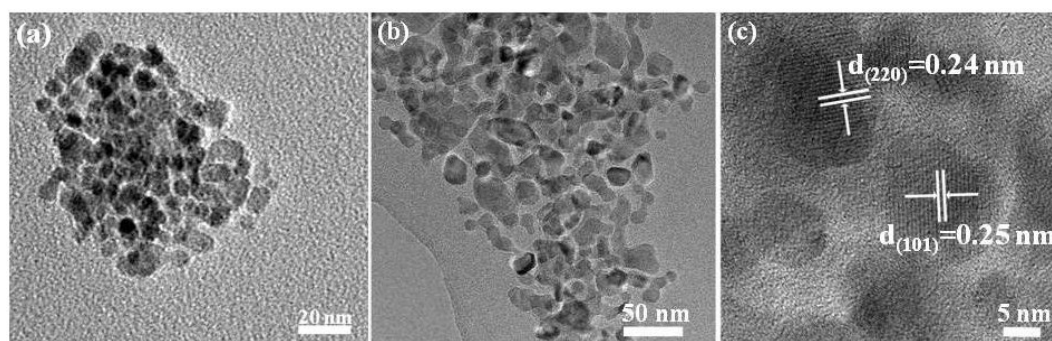

**Figure S6** TEM image of NiS-250 (a) and NiS-320 (b), the HRTEM of NiS-320(c).

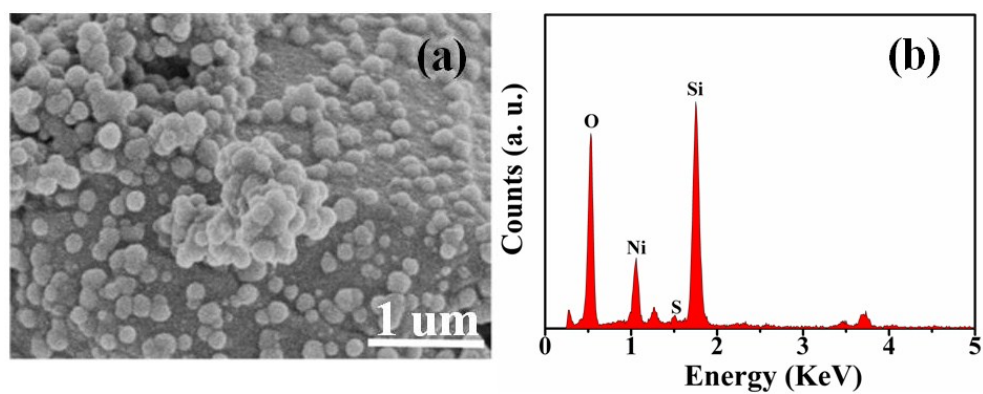

**Figure S7** SEM image of bulk NiS with large size and corresponding EDS.

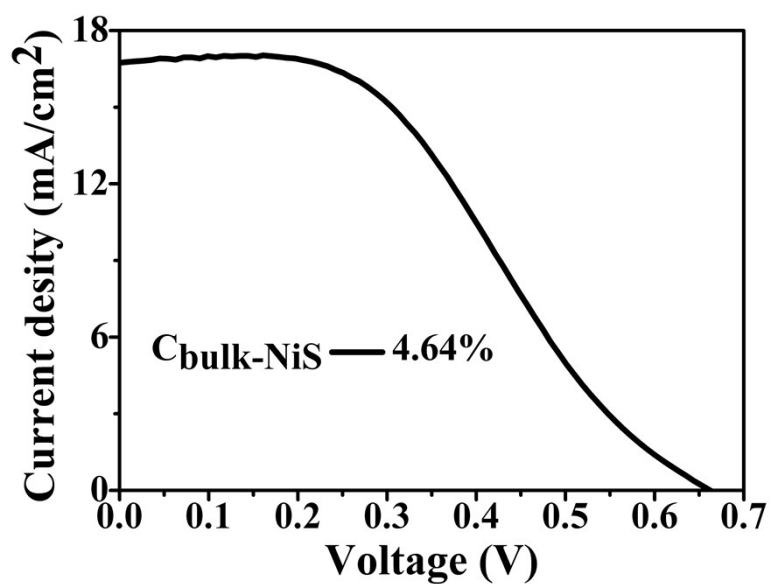

**Figure S8** Current-voltage characteristics of the DSSCs with  $C_{\text{bulk-NiS}}$  under one sun illumination.

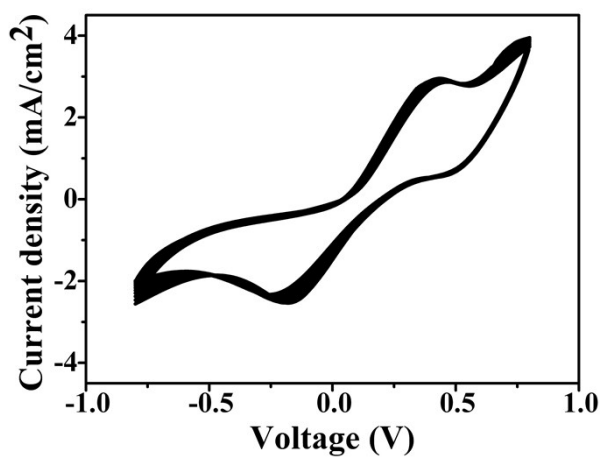

**Figure S9** Twenty consecutive CV curves for the  $E_{\text{pt}}$  at a scan rate of  $25 \text{ mV s}^{-1}$ .

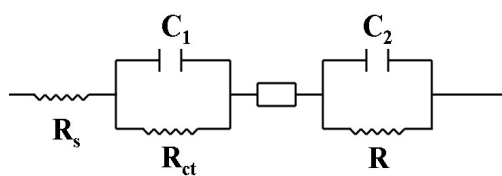

**Figure S10** equivalent circuit used to represent interfaces in dummy cells composed of two identical counter electrodes.

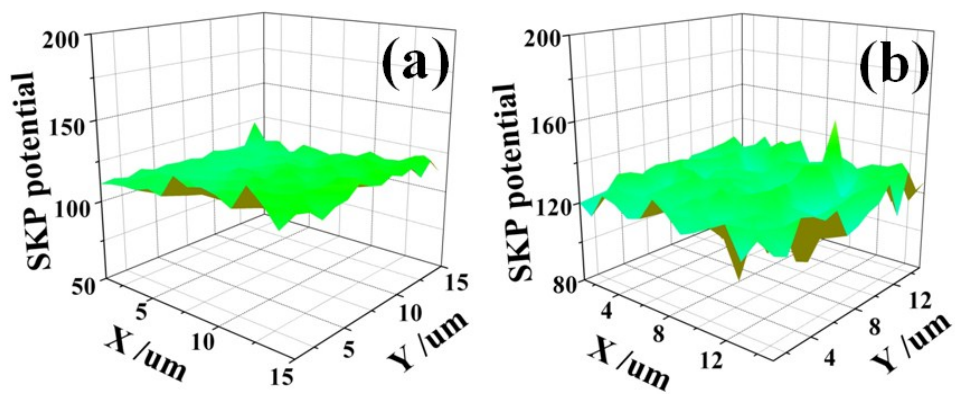

**Figure S11** Work function map of NiS-250 (a) and NiS-320 (b).
